# Supplementary material for: Genetic Variation and Population Structure in Native Americans
Source: PLOS journal article supplement (doi:10.1371/journal.pgen.0030185), 2007-11-19
Supplement: S6 (10.1371/journal.pgen.0030185.s006) [file journal.pgen.0030185.s006]

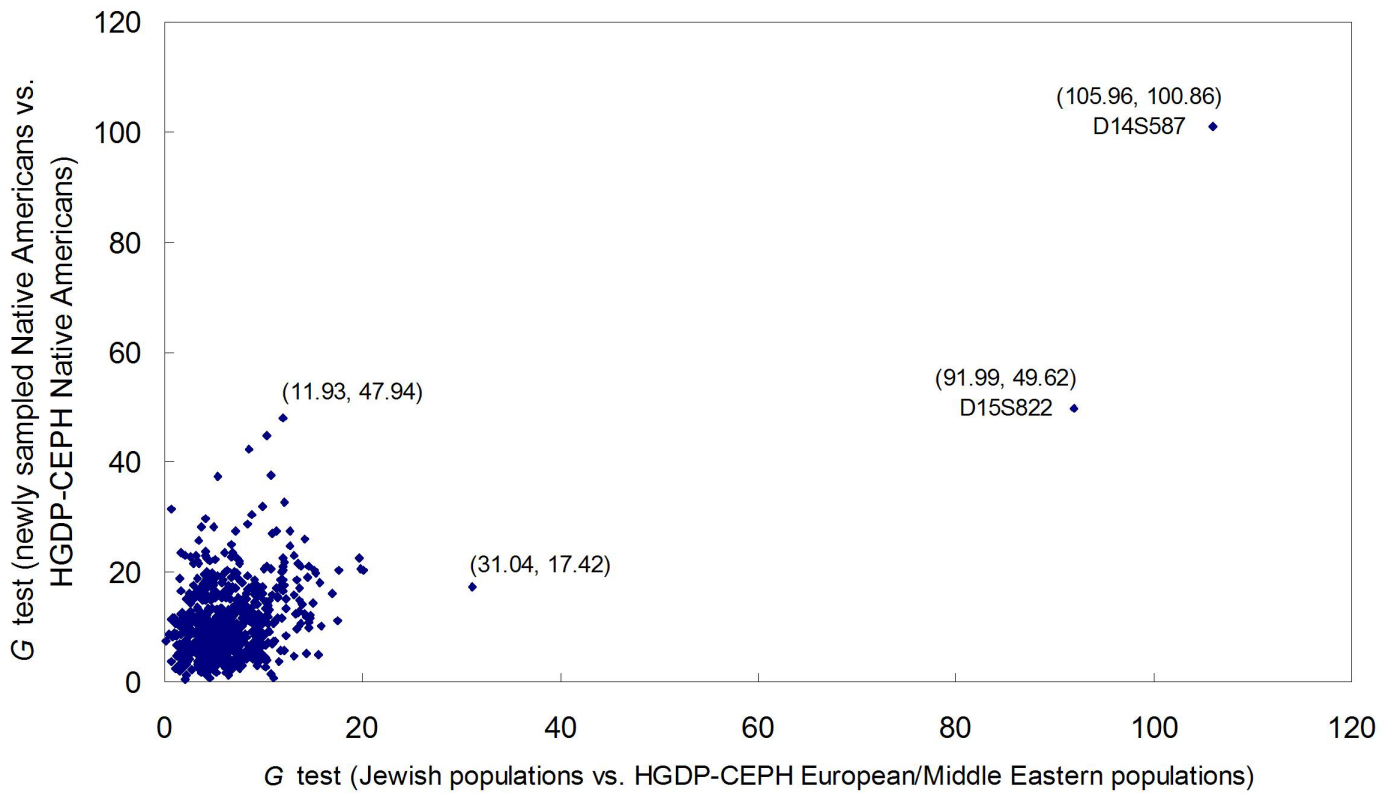

Figure S6
