# Supplementary figures and images for: Genetic Variation and Population Structure in Native Americans
Source: PLOS journal article supplement (doi:10.1371/journal.pgen.0030185), 2007-11-19

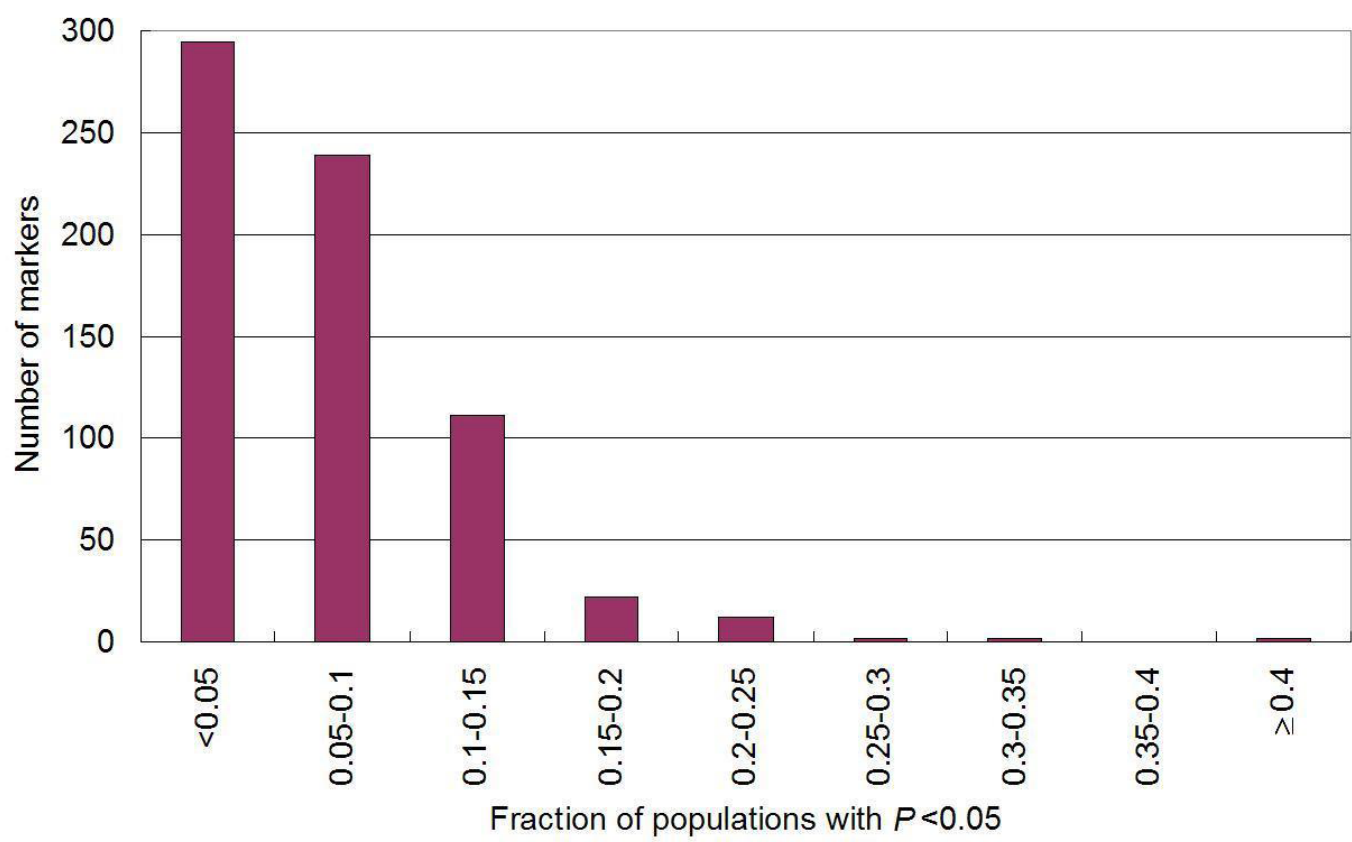

Figure S7

Supplement: S7 (10.1371/journal.pgen.0030185.s007) [file journal.pgen.0030185.s007]

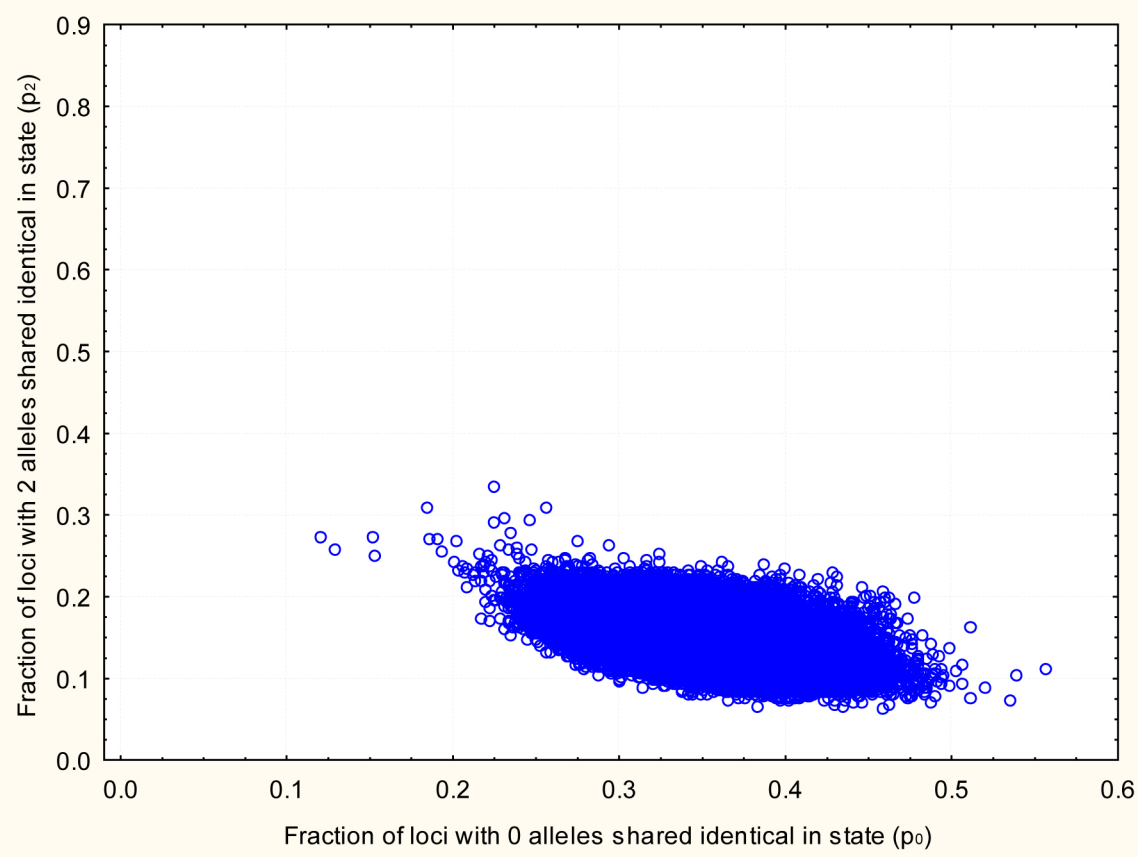

Figure S8

Supplement: S8 (10.1371/journal.pgen.0030185.s008) [file journal.pgen.0030185.s008]

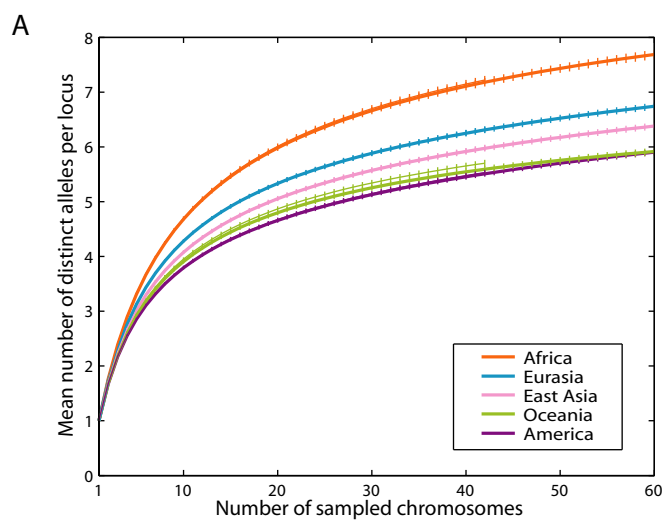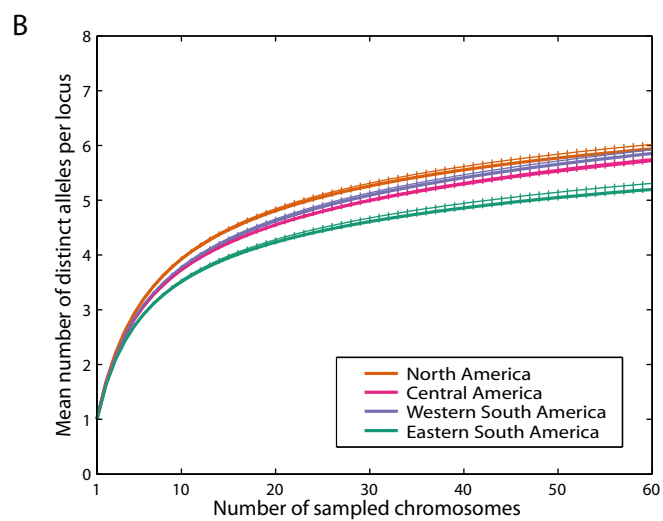

Figure S18

Supplement: S18 (10.1371/journal.pgen.0030185.s018) [file journal.pgen.0030185.s018]
